# Supplementary material for: 7,8,4′-Trihydroxyisoflavone, a Metabolized Product of Daidzein, Attenuates 6-Hydroxydopamine-Induced Neurotoxicity in SH-SY5Y Cells
Source: PubMed Central journal article supplement — Biomol Ther (Seoul). 2019 Mar 8;27(4):363–72. doi: 10.4062/biomolther.2018.211 (PMC6609108; doi:10.4062/biomolther.2018.211), 2019-03-08

# Supplementary Figure 1

Western blot Figure 4 in the manuscript

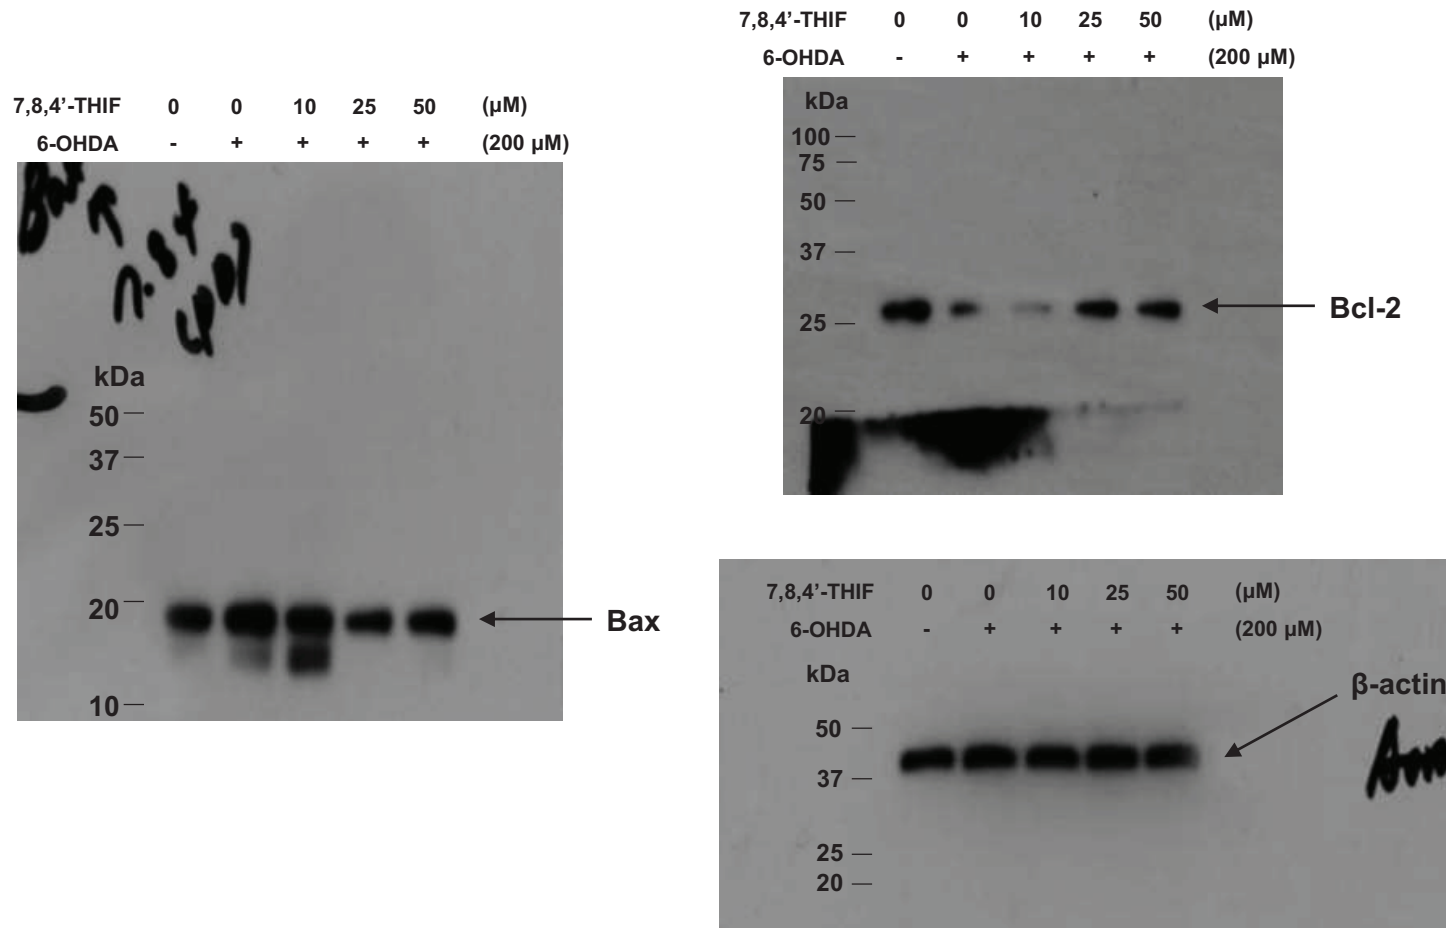

## Supplementary Figure 2

Western blot Figure 6 in the manuscript

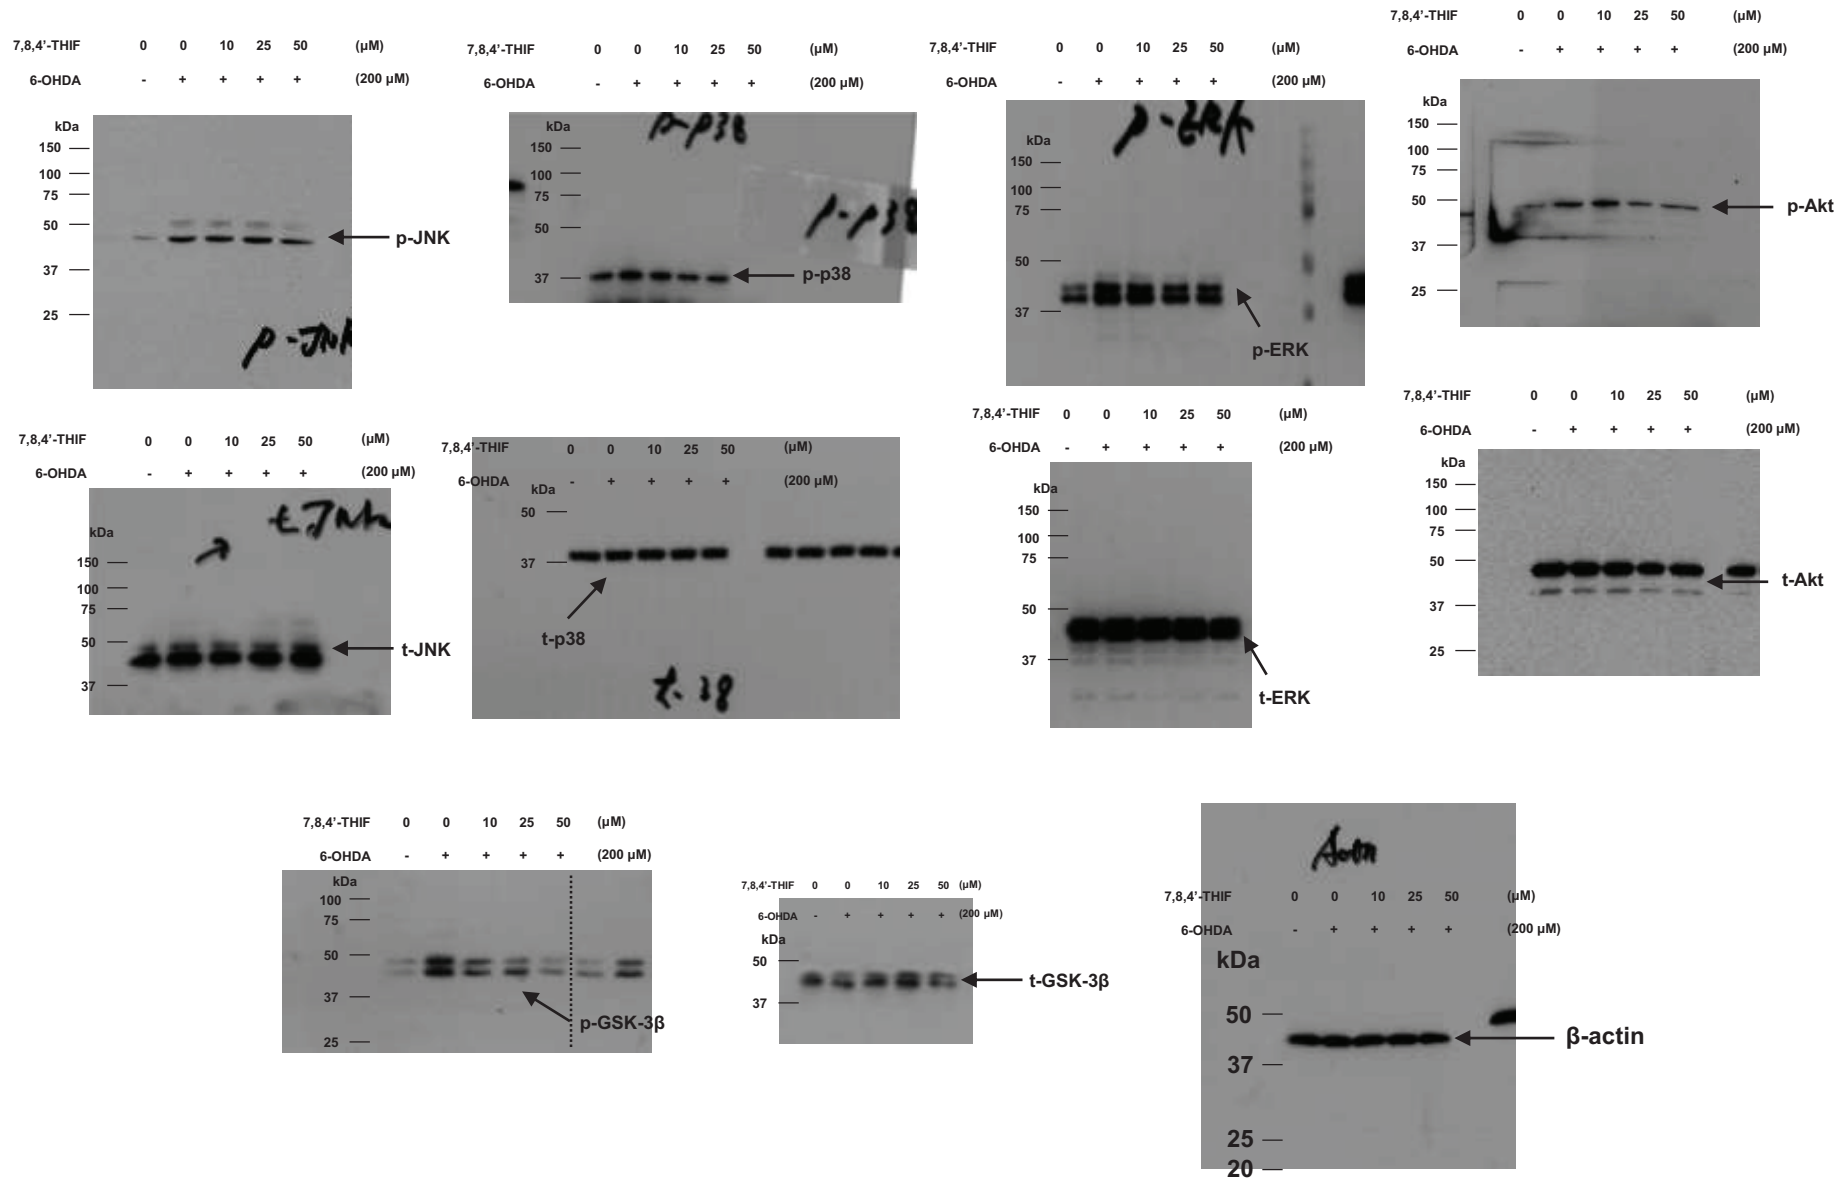

### Supplementary Figure 3

Western blot Figure 5 and 7 in the manuscript

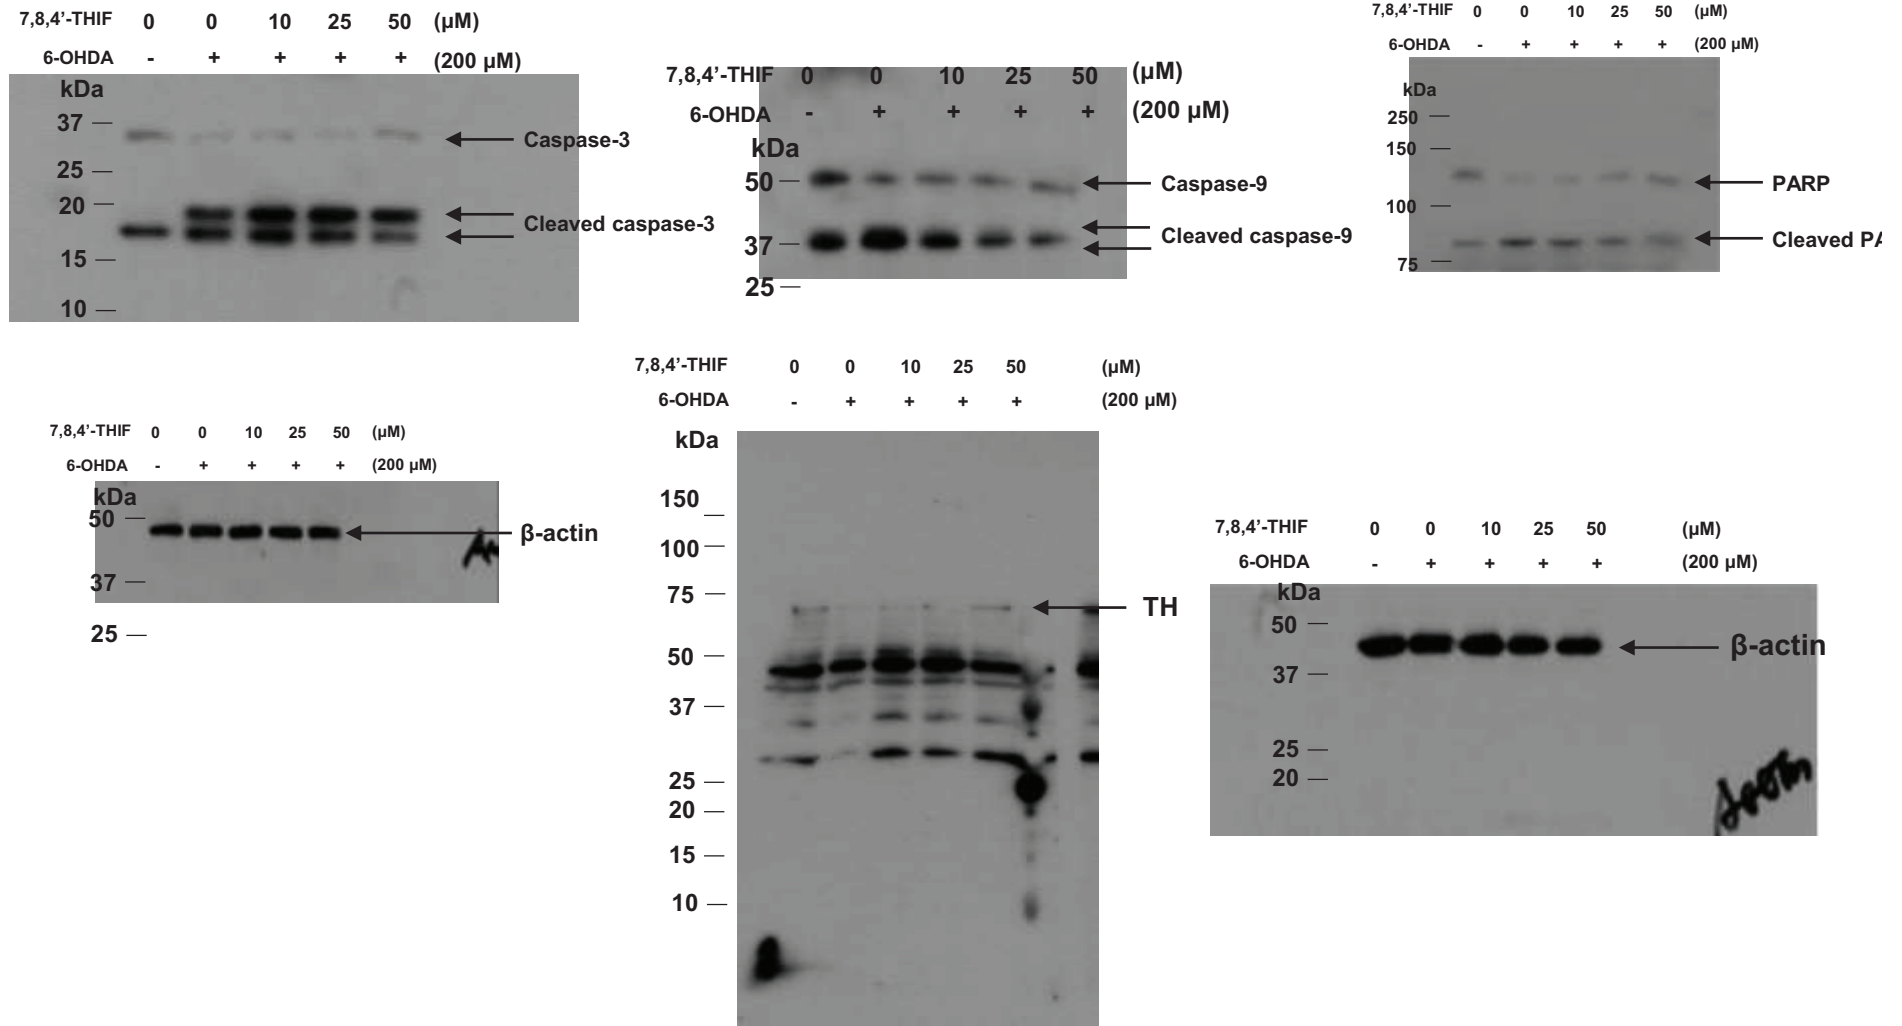

Supplement: bt-27-363_suppl.pdf [file bt-27-363_suppl.pdf]
